# Supplementary material
Source: PubMed Central journal article supplement (PMC2602670)

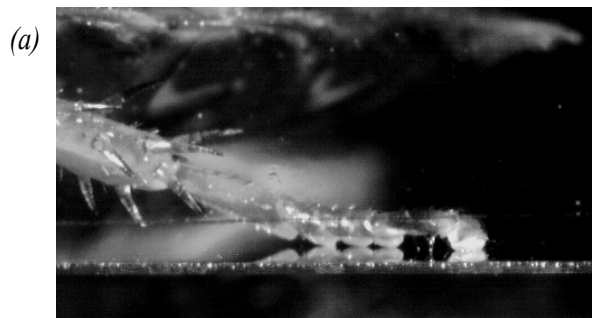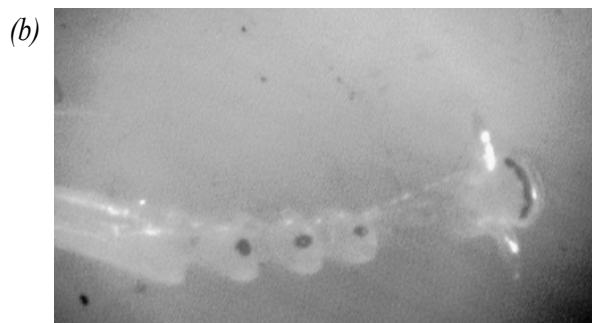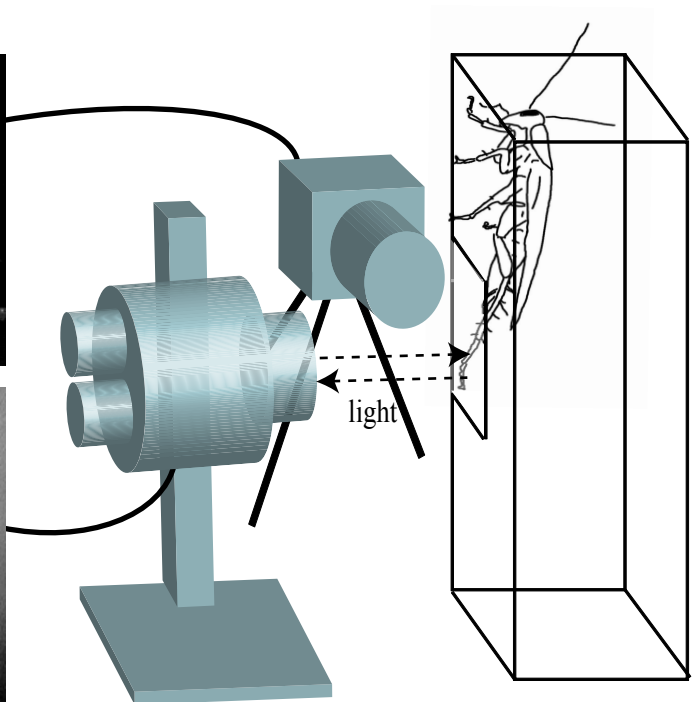

Supplement: rspb20071660s19.pdf [file rspb20071660s19.pdf]

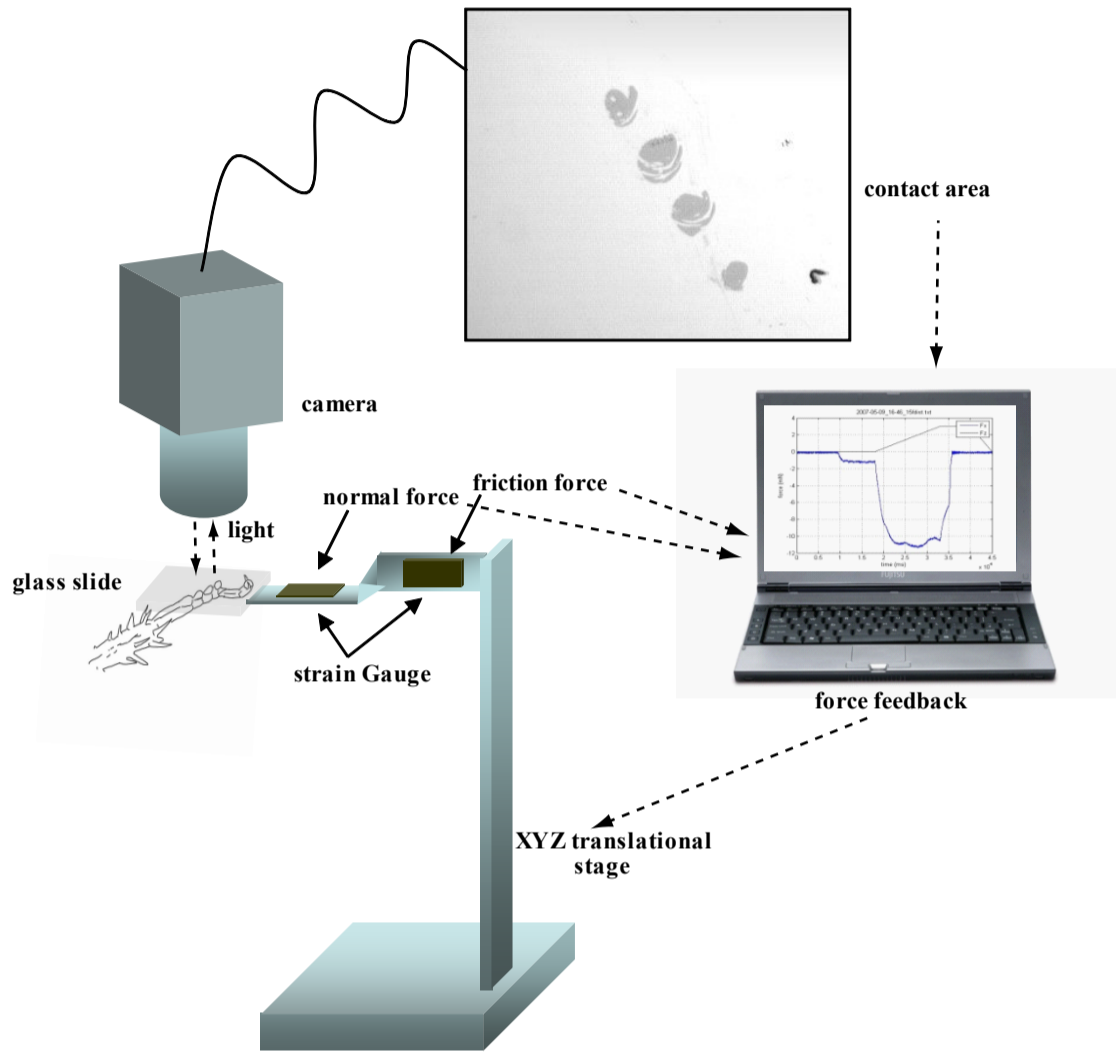

Supplement: rspb20071660s20.pdf [file rspb20071660s20.pdf]
